# Supplementary material for: Association of Violence With Emergence of Persecutory Delusions in Untreated Schizophrenia
Source: Atypon-hosted journal article supplement (doi:10.1176/appi.ajp.2013.13010134), 2013-11-13
Supplement: 332_ds001.pdf [file 332_ds001.pdf]

**Supplementary Table S1.** Associations between treatment status and demographic, historical, and clinical factors in prisoners with schizophrenia

|                                                        | Untreated | Treatment during prison only |              |       | Continued treatment |              |       |
|--------------------------------------------------------|-----------|------------------------------|--------------|-------|---------------------|--------------|-------|
|                                                        |           | Relative Risk Ratio          | 95%CI        | P     | Relative Risk Ratio | 95%CI        | P     |
| Age                                                    | Ref.      | 1.02                         | 0.96 - 1.08  | 0.597 | 1.01                | 0.96 - 1.06  | 0.766 |
| Gender                                                 | Ref.      | 4.50                         | 0.82 - 24.68 | 0.083 | 7.25                | 1.51 - 34.85 | 0.013 |
| Age at first imprisonment                              | Ref.      | 1.13                         | 0.99 - 1.30  | 0.080 | 1.12                | 0.98 - 1.28  | 0.089 |
| Previous prison sentence                               | Ref.      | 0.27                         | 0.05 - 1.48  | 0.132 | 0.18                | 0.04 - 0.88  | 0.034 |
| Number of previous convictions for violence            | Ref.      | 0.77                         | 0.50 - 1.18  | 0.232 | 0.83                | 0.57 - 1.22  | 0.346 |
| Number of previous sentences                           | Ref.      | 0.92                         | 0.75 - 1.14  | 0.462 | 0.85                | 0.70 - 1.04  | 0.108 |
| Violent index offence                                  | Ref.      | 1.93                         | 0.47 - 7.88  | 0.360 | 3.33                | 0.96 - 11.58 | 0.058 |
| Length of current sentence                             | Ref.      | 1.06                         | 0.89 - 1.26  | 0.499 | 1.02                | 0.88 - 1.18  | 0.827 |
| Received visits from family and friends                | Ref.      | 0.93                         | 0.25 - 3.47  | 0.918 | 1.30                | 0.41 - 4.13  | 0.656 |
| Received letters from family and friends               | Ref.      | 1.47                         | 0.08 - 25.32 | 0.792 | 0.88                | 0.09 - 8.51  | 0.915 |
| Had telephone calls with family and friends            | Ref.      | 2.22                         | 0.42 - 11.68 | 0.346 | 1.57                | 0.42 - 5.87  | 0.506 |
| Assaulted someone during prison                        | Ref.      | 1.01                         | 0.28 - 3.66  | 0.987 | 0.53                | 0.17 - 1.61  | 0.261 |
| Working during current sentence                        | Ref.      | 3.14                         | 0.26 - 37.99 | 0.368 | 2.57                | 0.39 - 16.91 | 0.326 |
| Placed in solitary confinement during current sentence | Ref.      | 1.67                         | 0.46 - 6.05  | 0.434 | 0.94                | 0.31 - 2.86  | 0.906 |
| Number of psychotic symptoms                           | Ref.      | 1.38                         | 0.77 - 2.47  | 0.281 | 1.66                | 0.98 - 2.81  | 0.057 |
| Diagnosis of major depression                          | Ref.      | 1.55                         | 0.36 - 6.61  | 0.557 | 1.55                | 0.45 - 5.53  | 0.486 |

**Supplementary Table S1.** Associations between treatment status and demographic, historical, and clinical factors in prisoners with schizophrenia  
(continued)

|                                    | Untreated | Treatment during prison only |              |       | Continued treatment |              |       |
|------------------------------------|-----------|------------------------------|--------------|-------|---------------------|--------------|-------|
|                                    |           | Relative Risk Ratio          | 95%CI        | P     | Relative Risk Ratio | 95%CI        | P     |
| Alcohol dependence                 | Ref.      | 0.83                         | 0.19 - 3.75  | 0.812 | 2.52                | 0.72 - 8.75  | 0.147 |
| Drug dependence                    | Ref.      | 0.78                         | 0.21 - 2.88  | 0.709 | 0.64                | 0.21 - 2.01  | 0.450 |
| Antisocial personality disorder    | Ref.      | 0.51                         | 0.09 - 3.06  | 0.465 | 0.30                | 0.06 - 1.47  | 0.138 |
| Borderline personality disorder    | Ref.      | 2.31                         | 0.51 - 10.57 | 0.280 | 6.22                | 1.59 - 24.31 | 0.009 |
| Received treatment prior to prison | Ref.      | 0.52                         | 0.13 - 2.12  | 0.360 | 1.57                | 0.42 - 5.87  | 0.506 |
| Psychopathy total score            | Ref.      | 1.00                         | 0.99 - 1.01  | 0.466 | 0.99                | 0.98 - 1.00  | 0.116 |
